# Supplementary material for: Detection of tumor marker miRNA21 based on phosphorescent resonance energy transfer of Mn–ZnS QDs
Source: Royal Society of Chemistry journal article supplement (doi:10.1039/c7ra04521b), 2017-01-01
Supplement: c7ra04521b1.pdf [file c7ra04521b1.pdf]

### Supplementary materials

**Table S1.** Sequences of oligonucleotides used in this study.

**Table S2.** Effect of co-existing substances on the RTP intensity of 50 nM RNA.

**Fig. S1.** (A) The RTP emission spectra of Mn- ZnS QDs ( $10 \text{ mg L}^{-1}$ ). Inset: schematic illustration of electronic transition involved in the RTP emission from Mn-ZnS QDs. Solutions were prepared in PBS (0.2M, pH 7.4) . (B) TEM image of MPA-capped Mn-ZnS QDs.

**Fig. S2.** Storage stability of prepared QDs<sup>+</sup>.

**Fig. S3.** TEM images of Mn-ZnS QD/PDADMAC(QDs<sup>+</sup>).

**Fig. S4.** Time-dependent RTP emission of the QDs<sup>+</sup>/ROX-DNA

**Table S1.** Sequences of oligonucleotides used in this study.

| Name of oligonucleotide        | Sequence of oligonucleotide                 |
|--------------------------------|---------------------------------------------|
| Probe DNA                      | 5'-T CAA CAT CAG TCT GAT AAG CTA-<br>ROX-3' |
| Target RNA (complementary RNA) | 5'-UAG CUU AUC AGA CUG AUG UUG A-3'         |
| Single-base mismatch RNA       | 5'-UAG CUU AUC AGA CUG AUG UAG A-3'         |
| Random RNA                     | 5'-UCA UUC CAG CUC GUA ACG CUA U-3'         |

**Table S2.** Effect of co-existing substances on the RTP intensity of 50 nM RNA.

| Co-existing substance | [Co-existing substance]<br>/ [RNA] | Change of the RTP<br>Intensity (%) |
|-----------------------|------------------------------------|------------------------------------|
| K <sup>+</sup>        | 6000                               | -4.5                               |
| Na <sup>+</sup>       | 10000                              | +2.3                               |
| Ca <sup>2+</sup>      | 1000                               | -3.6                               |
| Mg <sup>2+</sup>      | 2000                               | -4.1                               |
| Glucos                | 800                                | +0.5                               |
| <i>L</i> -Cys         | 300                                | +3.6                               |
| <i>L</i> -His         | 300                                | +4.2                               |
| <i>L</i> -Gly         | 300                                | +5.8                               |

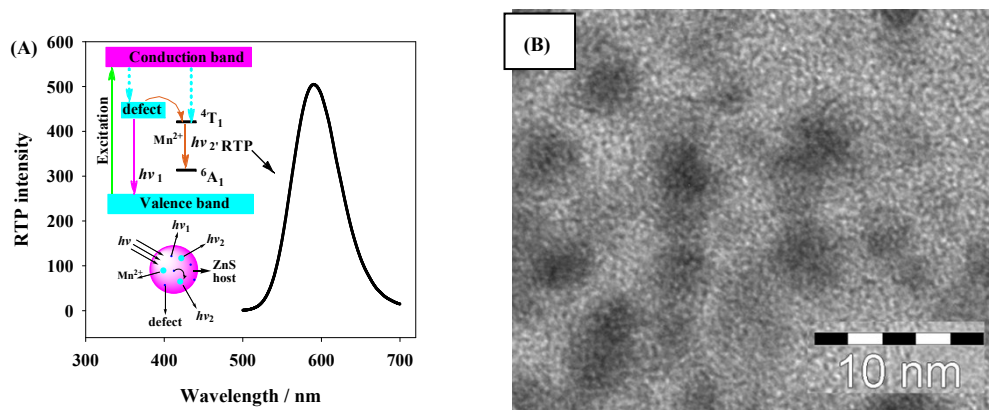

Fig. S1. (A) The RTP emission spectra of Mn- ZnS QDs ( $10 \text{ mg L}^{-1}$ ). Inset: schematic illustration of electronic transition involved in the RTP emission from Mn-ZnS QDs. Solutions were prepared in PBS (0.2M, pH 7.4). (B) TEM image of MPA-capped Mn-ZnS QDs.

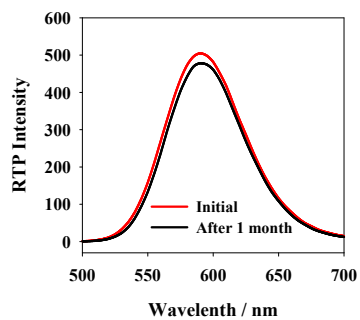

Fig. S2. Storage stability of prepared QDs<sup>+</sup>.

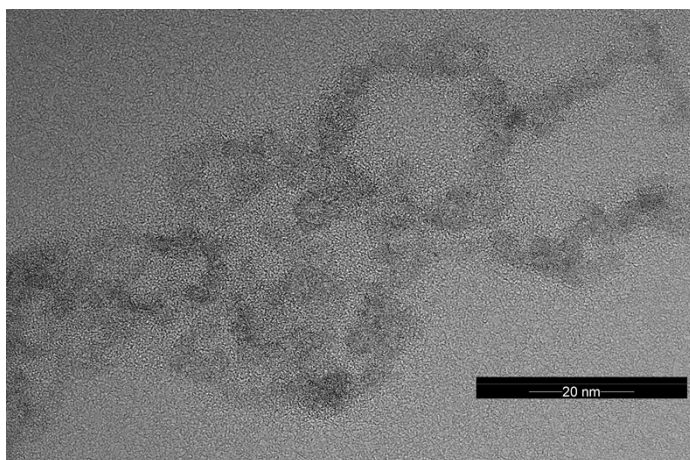

Fig. S3. TEM images of Mn-ZnS QD/PDADMAC(QDs<sup>+</sup>).

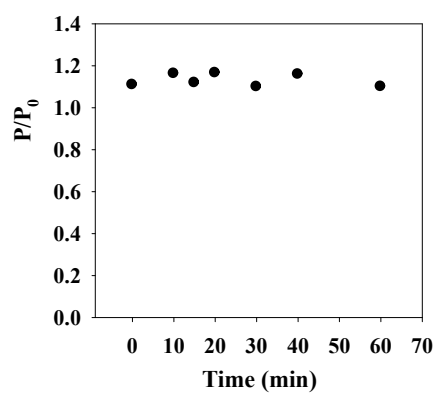

**Fig. S4.** Time-dependent RTP emission of the QDs<sup>+</sup>/ROX-DNA
